# Supplementary material for: Sequence Complexity of Amyloidogenic Regions in Intrinsically Disordered Human Proteins
Source: PLoS One. 2014 Mar 3;9(3):e89781. doi: 10.1371/journal.pone.0089781 (PMC3940659; doi:10.1371/journal.pone.0089781)
Supplement: Text S1 — Stable distribution function. Details of the statistical distribution function applied to AR/LCR length/content distribution. (DOCX) [file pone.0089781.s001.docx]

Stable distribution

- A stable distribution is defined in terms of its characteristic function , which satisfies a functional equation where for any *a* and *b* there exist *c* and *h* such that . The general solution to the functional equation has four parameters
- StableDistribution allows 0<α≤2, -1<β≤1, μ to be any real number, and σ to be any positive real number
- CharacteristicFunction[StableDistribution[0, α, ...], t] is continuous in α and given by
- CharacteristicFunction[StableDistribution[1, α, ...], t] is discontinuous in α and given by
